# Supplementary material
Source: PubMed Central journal article supplement (PMC2553291)
Supplement: JCI0834871sd.pdf [file JCI0834871sd.pdf]

**Supplemental Figure 1. Experimental design for in vivo vascular disease models.** ApoE-KO mice were employed in studies designed to investigate: **a)** aortic vascular disease burden and aneurysm formation, and **b)** vascular remodeling in a vein graft model characterized by the development of neointimal hyperplasia.

**Supplemental Figure 2. Apelin inhibits native atherosclerosis in the ApoE null model.** Apelin (2mg/kg/day) and AngII (1.4mg/kg/day) were administered by osmotic minipumps to ApoE-KO mice on a high fat diet. Relative area of vascular disease in the aortic root was significantly reduced in apelin treated mice ( $*P<0.05$  compared to saline). Black bar represents 200 $\mu$ m.

**Supplemental Figure 3. Apelin suppresses disease-related  $O_2^{\bullet-}$  production in vein grafts.** Cellular  $O_2^{\bullet-}$  production in vein grafts, measured by 2-hydroxyethidium (DHE) fluorescent nuclear staining in ApoE-KO mice was assessed in the endothelial and neointimal layers of the vessel wall. There was no difference in  $O_2^{\bullet-}$  production in the endothelium among the different conditions.  $O_2^{\bullet-}$  production was attenuated in the neointima in apelin treated mice even when co-administered with AngII (54%,  $*P<0.05$ , apelin vs. saline; and 48%,  $\dagger P<0.05$ , AngII+apelin vs. AngII alone). Vein graft vessel wall exhibits green autofluorescence. White arrows denote DHE staining, white arrowheads denote neointima, white bar represents 5  $\mu$ m.

**Supplemental Figure 4. Apelin does not compete with AngII for binding to the primary AngII receptor AT1R.** **a)** FAM-labeled

AngII (10 nM) binds to cells transfected with AT1R (blue curve) but not to cells with control vector transfection (red curve).

**b)** Unlabeled AngII (100 nM) inhibits binding of FAM-AngII (10 nM) to AT1R (blue curve), compared to FAM-AngII (10 nM) in the absence of unlabeled AngII (red curve).

**c)** Unlabeled apelin (100 nM) does not compete with FAM-AngII for binding to AT1R (blue curve) and shows no difference to FAM-AngII (10 nM) binding in the absence of apelin (red curve). The x-axis represents fluorescence intensity.

Supplemental Figure 1

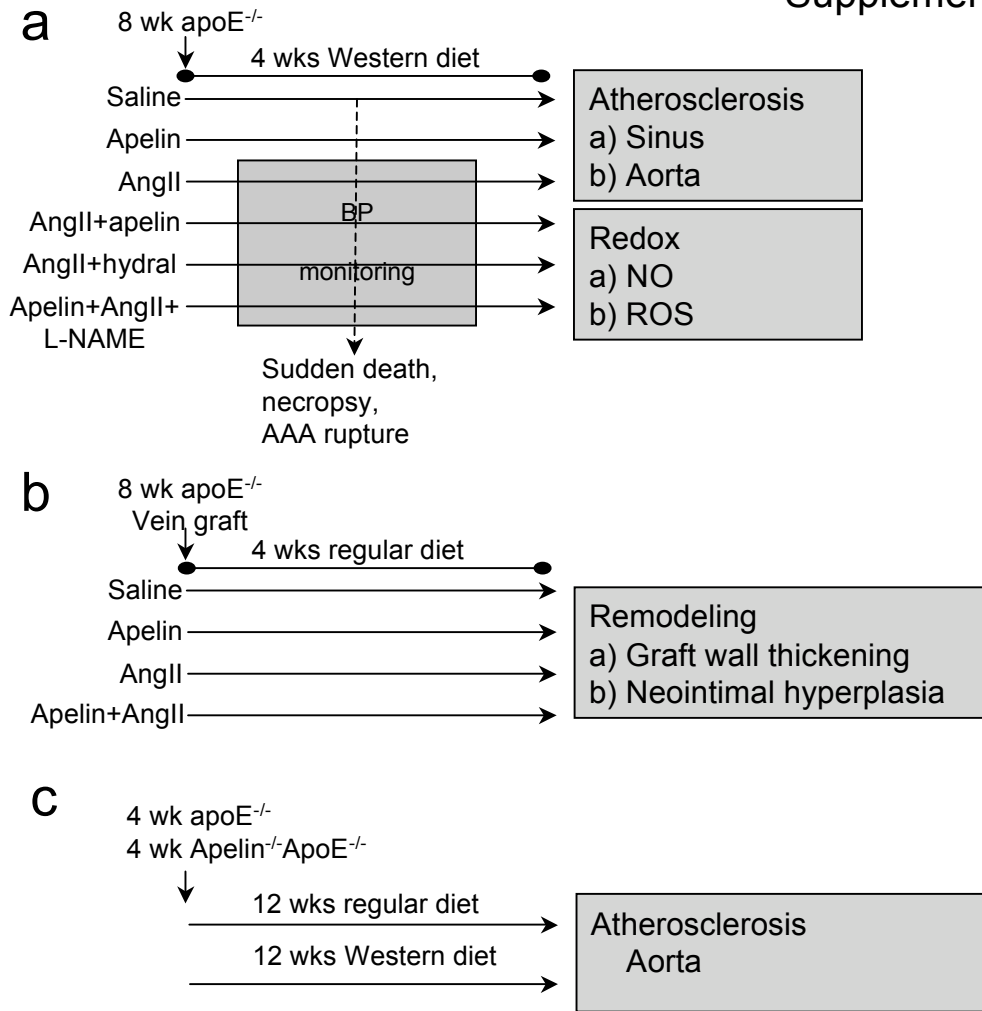

Supplemental Figure 2

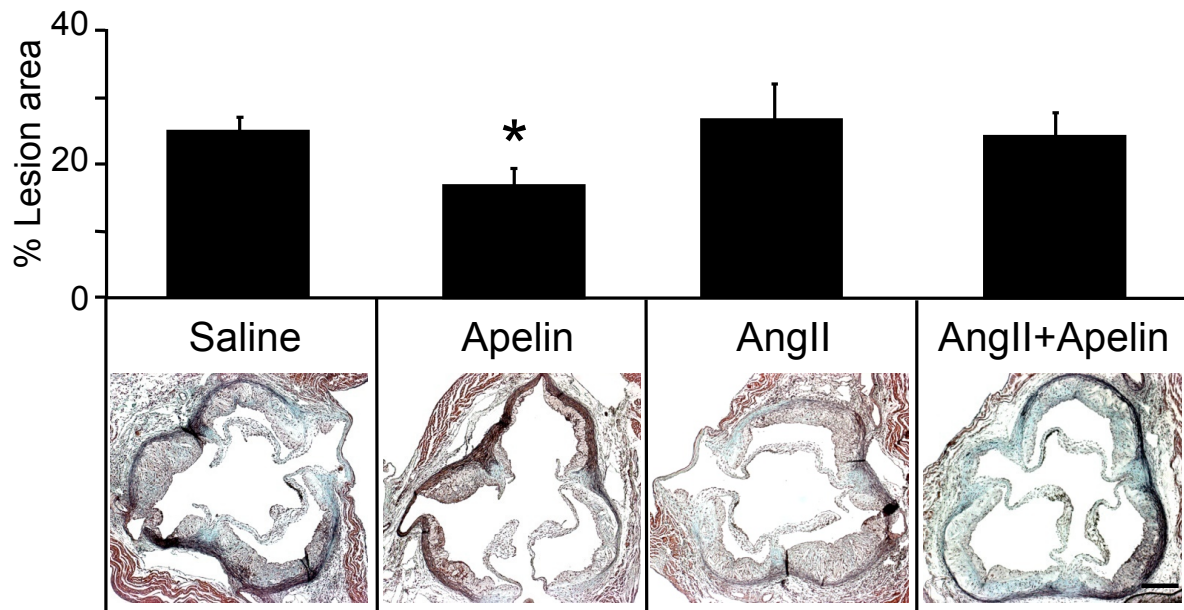

Supplemental Figure 3

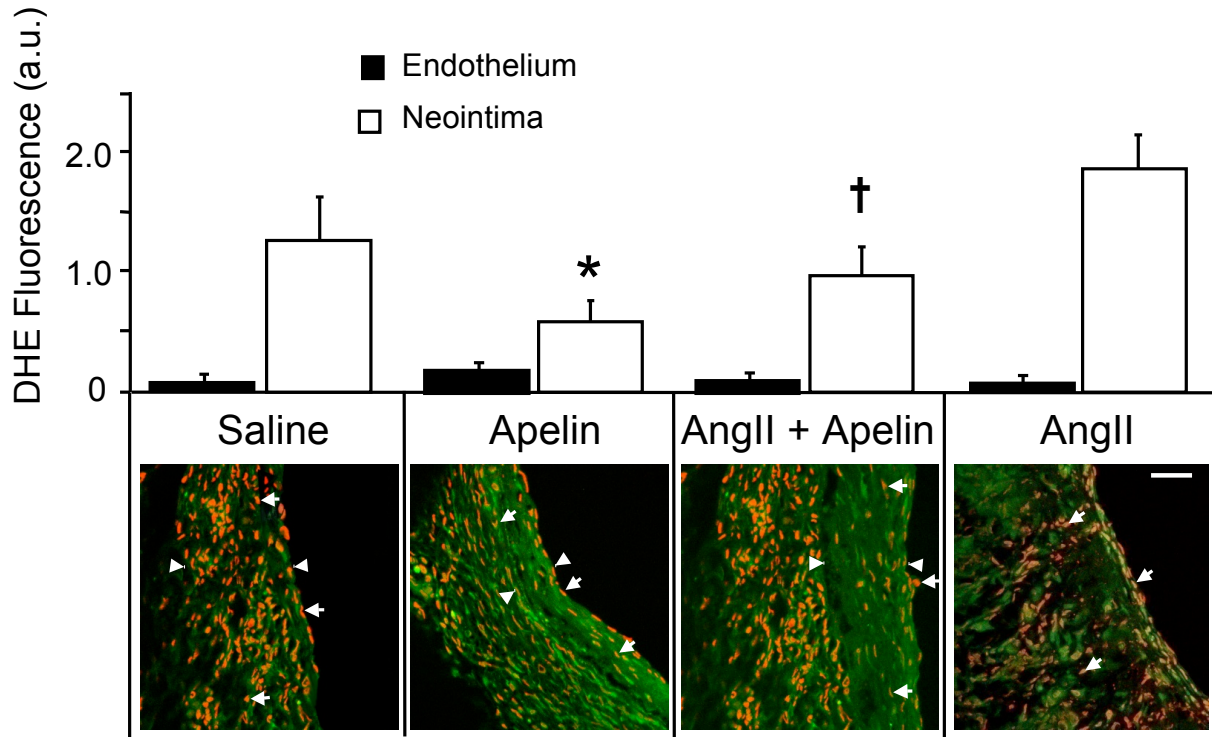

Supplemental Figure 4

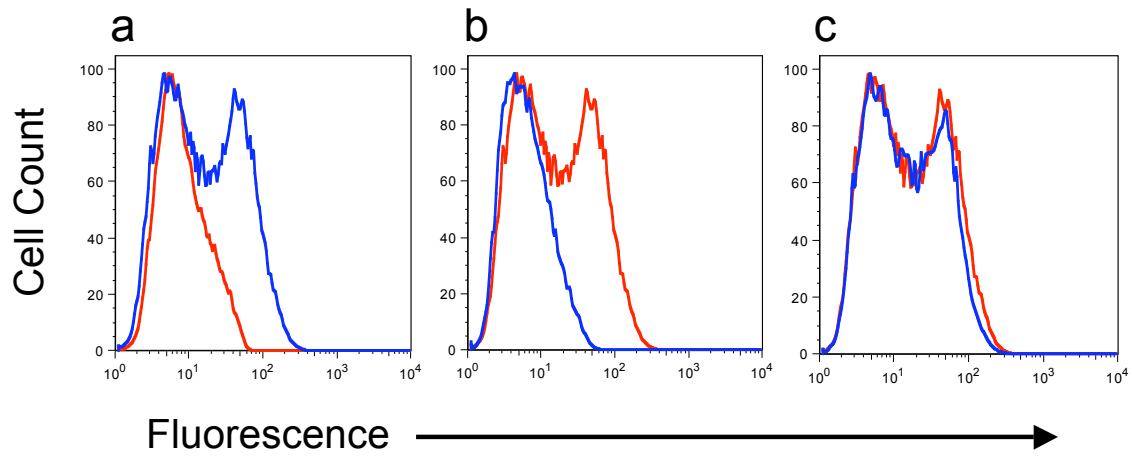

|                   | Saline               | Apelin              | Ang+apelin           | AngII                |
|-------------------|----------------------|---------------------|----------------------|----------------------|
| Total Cholesterol | 1201 <sub>+167</sub> | 1095 <sub>+93</sub> | 1236 <sub>+146</sub> | 1111 <sub>+121</sub> |
| HDL-Cholesterol   | 105 <sub>+12</sub>   | 86 <sub>+8</sub>    | 99 <sub>+9</sub>     | 108 <sub>+11</sub>   |
| Triglycerides     | 223 <sub>+112</sub>  | 211 <sub>+102</sub> | 191 <sub>+97</sub>   | 209 <sub>+126</sub>  |
| Body Weights      | 27 <sub>+2.4</sub>   | 24 <sub>+3.0</sub>  | 23 <sub>+4.6</sub>   | 27 <sub>+2.9</sub>   |

**Supplemental Table 1. - Lipid Profiles and Body Weights of Experimental Animals.**

Serum lipid values are expressed in mg/dl, and body weights in grams (statistical analysis with ANOVA).
